# Supplementary material
Source: MDPI journal article supplement (https://www.mdpi.com/2073-4395/13/3/813)
Supplement: s1 [file s1]

*Supplementary Materials*

# Breeding milestones correspond with changes to wheat rhizosphere biogeochemistry that affect P acquisition

Rebecca K. McGrail <sup>1,2\*</sup>, David A. Van Sanford <sup>3</sup> and David H. McNear, Jr. <sup>1</sup>

<sup>1</sup> Rhizosphere Science Laboratory, Department of Plant and Soil Sciences, University of Kentucky, 1100 South Limestone, Lexington, KY 40546-0091, United States of America

<sup>2</sup> Grassland Ecology Laboratory, Department of Plant and Soil Sciences, University of Kentucky, 1100 South Limestone, Lexington, KY 40546-0091, United States of America

<sup>3</sup> Wheat Breeding Group, Department of Plant and Soil Sciences, University of Kentucky, 1405 Veterans Drive, Lexington, KY 40546-0091, United States of America

\* Correspondence: rkmcgrail@gmail.com;

**Table S1.** Initial physicochemical properties of Crider silt soil.

|                                                     |       |
|-----------------------------------------------------|-------|
| % Sand                                              | 6.27  |
| % Silt                                              | 82.88 |
| % Clay                                              | 10.85 |
| Soil Texture                                        | silt  |
| KCl pH                                              | 4.46  |
| Meh-III P (mg kg <sup>-1</sup> )                    | 6.0   |
| Resin-Inorganic P (mg kg <sup>-1</sup> )            | 8.86  |
| Bicarbonate-Inorganic P (mg kg <sup>-1</sup> )      | 15.82 |
| Meh-III K (mg kg <sup>-1</sup> )                    | 94.0  |
| Meh-III Ca (mg kg <sup>-1</sup> )                   | 1024  |
| Meh-III Mg (mg kg <sup>-1</sup> )                   | 126   |
| Meh-III Zn (mg kg <sup>-1</sup> )                   | 1.35  |
| Meh-III Cu (mg kg <sup>-1</sup> )                   | 1.16  |
| Meh-III Mn (mg kg <sup>-1</sup> )                   | 134   |
| Meh-III Fe (mg kg <sup>-1</sup> )                   | 215   |
| Meh-III Al (mg kg <sup>-1</sup> )                   | 731   |
| Total N (%)                                         | 0.169 |
| Total C (%)                                         | 1.992 |
| Cation Exchange Capacity (meq 100 g <sup>-1</sup> ) | 13.40 |
| Base Saturation (%)                                 | 53.17 |
| Exchangeable K (meq 100 g <sup>-1</sup> )           | 0.30  |
| Exchangeable Ca (meq 100 g <sup>-1</sup> )          | 5.73  |
| Exchangeable Mg (meq 100 g <sup>-1</sup> )          | 1.07  |
| Exchangeable Na (meq 100 g <sup>-1</sup> )          | 0.03  |

**Table S2.** Complete statistical results of two-way ANOVA for explanatory parameters informing P utilization efficiency (PUE) and root P acquisition efficiency (RPAE) by dwarfing status and era of release under sufficient and insufficient soil P.

|                                                | Sufficient P    |                 |                 |                 | Insufficient P  |                 |                 |                 |
|------------------------------------------------|-----------------|-----------------|-----------------|-----------------|-----------------|-----------------|-----------------|-----------------|
|                                                | Dwarfing Status |                 | Era             |                 | Dwarfing Status |                 | Era             |                 |
|                                                | <i>F</i> -value | <i>p</i> -value |
| Plant Growth Metrics                           |                 |                 |                 |                 |                 |                 |                 |                 |
| Growth Stage                                   | 0.53            | 0.4702          | 3.01            | 0.0892          | <b>4.29</b>     | <b>0.0440</b>   | <b>11.8</b>     | <b>0.0017</b>   |
| Main Stem Height                               | <b>12.53</b>    | <b>0.0009</b>   | 0.50            | 0.4810          | <b>8.85</b>     | <b>0.0047</b>   | 1.77            | 0.1902          |
| Number of Tillers                              | 1.78            | 0.1886          | 1.31            | 0.2586          | 0.06            | 0.8061          | 2.99            | 0.0907          |
| Number of Heads                                | 0.06            | 0.8085          | 3.72            | 0.0601          | 1.49            | 0.2286          | <b>5.86</b>     | <b>0.0196</b>   |
| Shoot Mass                                     | <b>5.70</b>     | <b>0.0212</b>   | 0.20            | 0.6562          | 1.15            | 0.2894          | 0.96            | 0.3327          |
| Root Mass                                      | 0.91            | 0.3451          | 1.67            | 0.2034          | 0.24            | 0.6259          | 0.87            | 0.3556          |
| Root:Shoot Ratio                               | 1.10            | 0.2994          | 3.97            | 0.0525          | 0.00            | 0.9961          | 0.44            | 0.5089          |
| Nutrient Concentrations (mg kg <sup>-1</sup> ) |                 |                 |                 |                 |                 |                 |                 |                 |
| Shoot Ca                                       | 0.20            | 0.6536          | 0.25            | 0.6216          | 1.78            | 0.1867          | 0.03            | 0.8600          |
| Shoot K                                        | 0.15            | 0.6970          | 2.58            | 0.1151          | <b>4.59</b>     | <b>0.0374</b>   | <b>5.52</b>     | <b>0.0231</b>   |
| Shoot Al                                       | 0.16            | 0.6901          | 0.64            | 0.4263          | 0.83            | 0.3679          | 0.52            | 0.4729          |
| Shoot Fe                                       | 0.00            | 0.9751          | 0.40            | 0.5327          | 0.37            | 0.5477          | 1.15            | 0.2898          |
| Shoot Mg                                       | 0.96            | 0.3322          | <b>12.82</b>    | <b>0.0008</b>   | <b>5.76</b>     | <b>0.0205</b>   | <b>6.41</b>     | <b>0.0148</b>   |
| Shoot Mn                                       | 0.63            | 0.4297          | 1.38            | 0.2465          | 0.27            | 0.6061          | 1.80            | 0.1867          |
| Shoot P                                        | <b>11.27</b>    | <b>0.0016</b>   | 0.01            | 0.9275          | <b>11.62</b>    | <b>0.0014</b>   | 2.58            | 0.1147          |
| Root Ca                                        | 2.52            | 0.1201          | 0.00            | 0.9658          | 1.77            | 0.1906          | 0.05            | 0.8327          |

|                                                           |                 |                 |                 |                 |                 |                 |                 |                 |
|-----------------------------------------------------------|-----------------|-----------------|-----------------|-----------------|-----------------|-----------------|-----------------|-----------------|
| Root K                                                    | 0.15            | 0.7934          | 0.02            | 0.8808          | 0.22            | 0.6377          | 1.29            | 0.2627          |
| Sufficient P                                              |                 |                 |                 |                 | Insufficient P  |                 |                 |                 |
| Dwarfing Status                                           |                 | Era             |                 |                 | Dwarfing Status |                 | Era             |                 |
|                                                           | <i>F</i> -value | <i>p</i> -value |
| Nutrient Concentrations (mg kg <sup>-1</sup> ), Continued |                 |                 |                 |                 |                 |                 |                 |                 |
| Root Al                                                   | <b>4.87</b>     | <b>0.0328</b>   | 2.93            | 0.0940          | 0.65            | 0.4228          | 0.09            | 0.7675          |
| Root Fe                                                   | <b>5.57</b>     | <b>0.0229</b>   | <b>4.75</b>     | <b>0.0349</b>   | 0.54            | 0.4663          | 0.00            | 0.9905          |
| Root Mg                                                   | 2.15            | 0.1495          | 0.03            | 0.8751          | 0.02            | 0.8857          | 0.81            | 0.3734          |
| Root Mn                                                   | 1.38            | 0.2471          | 0.00            | 0.9814          | 1.14            | 0.2912          | 0.16            | 0.6937          |
| Root P                                                    | 1.58            | 0.2152          | 0.59            | 0.4466          | 0.41            | 0.5245          | 0.04            | 0.8446          |
| Total Nutrient Content (mg)                               |                 |                 |                 |                 |                 |                 |                 |                 |
| Shoot Ca                                                  | <b>7.39</b>     | <b>0.0092</b>   | 0.00            | 0.9795          | 2.76            | 0.1037          | 1.42            | 0.2402          |
| Shoot K                                                   | <b>5.85</b>     | <b>0.0195</b>   | 0.09            | 0.7674          | 2.77            | 0.1029          | 3.26            | 0.0776          |
| Shoot Al                                                  | <b>4.60</b>     | <b>0.0373</b>   | 0.45            | 0.5037          | 3.28            | 0.0767          | 0.67            | 0.4156          |
| Shoot Fe                                                  | <b>7.67</b>     | <b>0.0081</b>   | 0.61            | 0.4398          | 3.09            | 0.0853          | <b>5.29</b>     | <b>0.0261</b>   |
| Shoot Mg                                                  | <b>4.41</b>     | <b>0.0413</b>   | 0.67            | 0.4165          | 0.30            | 0.5847          | 3.06            | 0.0867          |
| Shoot Mn                                                  | <b>4.62</b>     | <b>0.0370</b>   | 0.03            | 0.8585          | 0.92            | 0.3417          | 2.27            | 0.1391          |
| Shoot P                                                   | 1.34            | 0.2531          | 0.17            | 0.6860          | 0.53            | 0.4686          | 0.00            | 0.9699          |
| Root Ca                                                   | 0.72            | 0.4014          | 1.65            | 0.2063          | 1.15            | 0.2900          | 0.30            | 0.5853          |
| Root K                                                    | 0.81            | 0.3718          | 2.55            | 0.1176          | 0.09            | 7.598           | <b>4.34</b>     | <b>0.0428</b>   |
| Root Al                                                   | 0.00            | 0.9829          | 2.18            | 0.1473          | 1.10            | 0.2990          | 0.38            | 0.5420          |
| Root Fe                                                   | 0.52            | 0.4762          | 0.78            | 0.3814          | 0.73            | 0.3988          | 0.95            | 0.3353          |
| Root Mg                                                   | 1.48            | 0.2298          | 0.35            | 0.5567          | 0.27            | 0.6031          | 0.03            | 0.8556          |

|                                        | Sufficient P    |                 |                 |                 | Insufficient P  |                 |                 |                 |
|----------------------------------------|-----------------|-----------------|-----------------|-----------------|-----------------|-----------------|-----------------|-----------------|
|                                        | Dwarfing Status |                 | Era             |                 | Dwarfing Status |                 | Era             |                 |
|                                        | <i>F</i> -value | <i>p</i> -value |
| Total Nutrient Content (mg), Continued |                 |                 |                 |                 |                 |                 |                 |                 |
| Root Mn                                | 1.66            | 0.2043          | 0.01            | 0.9118          | 0.39            | 0.5349          | 0.02            | 0.8927          |
| Root P                                 | 1.30            | 0.2606          | 0.43            | 0.5146          | 0.33            | 0.5687          | 0.95            | 0.3350          |
| Bulk Soil Chemical Parameters          |                 |                 |                 |                 |                 |                 |                 |                 |
| pH                                     | 0.05            | 0.8271          | 0.02            | 0.8863          | 0.09            | 0.7617          | 0.02            | 0.8943          |
| P                                      | <b>5.17</b>     | <b>0.0278</b>   | 0.01            | 0.9223          | 1.45            | 0.2344          | 1.86            | 0.1798          |
| K                                      | <b>7.64</b>     | <b>0.0082</b>   | 0.96            | 0.3317          | 1.06            | 0.3087          | 1.91            | 0.1734          |
| Ca                                     | 0.68            | 0.4128          | 0.07            | 0.7991          | 0.24            | 0.6298          | 0.02            | 0.8826          |
| Mg                                     | 0.01            | 0.7535          | 0.91            | 0.3442          | <b>4.21</b>     | <b>0.0460</b>   | 0.06            | 0.8071          |
| Zn                                     | 3.12            | 0.0843          | 0.10            | 0.7504          | 0.78            | 0.3822          | 0.27            | 0.6062          |
| Cu                                     | 0.58            | 0.4500          | 2.83            | 0.0994          | <b>4.29</b>     | <b>0.0441</b>   | 0.02            | 0.8938          |
| Fe                                     | 0.81            | 0.3726          | 2.28            | 0.1383          | 0.88            | 0.3532          | 1.95            | 0.1691          |
| Mn                                     | 1.19            | 0.2817          | <b>10.83</b>    | <b>0.0019</b>   | 0.06            | 0.8070          | 2.93            | 0.0939          |
| Al                                     | 0.22            | 0.6408          | 0.62            | 0.4361          | 1.66            | 0.2040          | 2.49            | 0.1213          |
| Total N                                | 1.74            | 0.1941          | 0.00            | 0.9947          | 1.27            | 0.2663          | 1.10            | 0.2988          |
| Total C                                | 0.03            | 0.8655          | 0.66            | 0.4213          | 0.66            | 0.4190          | 2.16            | 0.1480          |
| Rhizosphere Soil Inorganic P Fractions |                 |                 |                 |                 |                 |                 |                 |                 |
| Resin P                                | 0.13            | 0.7251          | 0.02            | 0.8798          | 0.51            | 0.4798          | <b>5.42</b>     | <b>0.0243</b>   |
| Bicarbonate P                          | 0.44            | 0.5093          | 0.15            | 0.7009          | <b>6.48</b>     | <b>0.0143</b>   | 0.04            | 0.8452          |

|                                    | Sufficient P         |                 |                      |                 | Insufficient P       |                 |                      |                 |
|------------------------------------|----------------------|-----------------|----------------------|-----------------|----------------------|-----------------|----------------------|-----------------|
|                                    | Dwarfing Sta-<br>tus | Era             |
|                                    | <i>F</i> -value      | <i>p</i> -value |
| Rhizosphere Soil Microbial Biomass |                      |                 |                      |                 |                      |                 |                      |                 |
| Total Biomass                      | 3.08                 | 0.0859          | 2.68                 | 0.1082          | 0.37                 | 0.5467          | 1.14                 | 0.2916          |
| G+ Bacteria                        | <b>10.90</b>         | <b>0.0019</b>   | 0.13                 | 0.7222          | <b>5.05</b>          | <b>0.0295</b>   | 0.06                 | 0.8035          |
| G- Bacteria                        | 0.08                 | 0.7735          | <b>7.09</b>          | <b>0.0106</b>   | 0.09                 | 0.7892          | 2.48                 | 0.1218          |
| General Fungi                      | 0.06                 | 0.8040          | 0.04                 | 0.8345          | 0.67                 | 0.4160          | 1.02                 | 0.3178          |
| AMF                                | 2.39                 | 0.1287          | 2.94                 | 0.0934          | 0.71                 | 0.4045          | 0.39                 | 0.5371          |
| Actinobacteria                     | 2.76                 | 0.1035          | <b>6.51</b>          | <b>0.0141</b>   | 0.19                 | 0.6634          | 3.43                 | 0.0706          |
| Protists                           | <b>5.43</b>          | <b>0.0242</b>   | 1.63                 | 0.2083          | <b>6.96</b>          | <b>0.0113</b>   | 0.09                 | 0.7694          |

**Table S3.** Average (least squares means  $\pm$  one standard error) growth metrics and tissue nutrient concentration by cultivar dwarfing status. Parameters not sharing the same uppercase (sufficient P) or lowercase (insufficient P) letter are significantly different (Tukey's HSD,  $p < 0.05$ ).

|                                                           | Sufficient P        |                     | Insufficient P      |                     |
|-----------------------------------------------------------|---------------------|---------------------|---------------------|---------------------|
|                                                           | Wild type           | Semi-dwarf          | Wild type           | Semi-dwarf          |
| Plant Growth Metrics                                      |                     |                     |                     |                     |
| Growth Stage                                              | 10.5 A              | 10.5 A              | 10.5 b              | 11 a                |
| Main Stem Height (cm)                                     | 59 $\pm$ 2 A        | 47 $\pm$ 3 B        | 52 $\pm$ 2 a        | 44 $\pm$ 3 b        |
| Number of Tillers                                         | 2.7 $\pm$ 0.2 A     | 2.2 $\pm$ 0.3 A     | 1.8 $\pm$ 0.3 a     | 1.9 $\pm$ 0.3 a     |
| Number of Heads                                           | 1.5 $\pm$ 0.1 A     | 1.5 $\pm$ 0.2 A     | 0.86 $\pm$ 0.05 a   | 0.95 $\pm$ 0.06 a   |
| Shoot Mass (g)                                            | 1.3 $\pm$ 0.1 A     | 0.9 $\pm$ 0.1 B     | 0.47 $\pm$ 0.05 a   | 0.41 $\pm$ 0.06 a   |
| Root Mass (g)                                             | 0.34 $\pm$ 0.05 A   | 0.26 $\pm$ 0.07 A   | 0.110 $\pm$ 0.009 a | 0.10 $\pm$ 0.01 a   |
| Root: Shoot Ratio (g g <sup>-1</sup> )                    | 0.26 $\pm$ 0.04 A   | 0.32 $\pm$ 3 A      | 0.26 $\pm$ 0.06 a   | 0.26 $\pm$ 0.07 a   |
| Tissue Nutrient Concentration (mg g <sup>-1</sup> tissue) |                     |                     |                     |                     |
| Shoot P                                                   | 1.2 $\pm$ 0.1 B     | 1.7 $\pm$ 0.2 A     | 1.51 $\pm$ 0.08 b   | 2.0 $\pm$ 0.1 a     |
| Shoot K                                                   | 25 $\pm$ 1 A        | 26 $\pm$ 1 A        | 25.9 $\pm$ 0.7 a    | 23.3 $\pm$ 0.9 b    |
| Shoot Ca                                                  | 4.9 $\pm$ 0.2 A     | 4.7 $\pm$ 0.3 A     | 7.3 $\pm$ 0.4 a     | 6.4 $\pm$ 0.5 a     |
| Shoot Mg                                                  | 1.15 $\pm$ 0.04 A   | 1.22 $\pm$ 0.05 A   | 1.32 $\pm$ 0.04 b   | 1.46 $\pm$ 0.05 a   |
| Shoot Mn                                                  | 0.117 $\pm$ 0.006 A | 0.126 $\pm$ 0.008 A | 0.123 $\pm$ 0.009 a | 0.13 $\pm$ 0.01 a   |
| Shoot Fe                                                  | 0.107 $\pm$ 0.008 A | 0.11 $\pm$ 0.01 A   | 0.17 $\pm$ 0.01 a   | 0.16 $\pm$ 0.02 a   |
| Shoot Al                                                  | 0.042 $\pm$ 0.006 A | 0.045 $\pm$ 0.007 A | 0.053 $\pm$ 0.005 a | 0.047 $\pm$ 0.007 a |
| Root P                                                    | 0.7 $\pm$ 0.1 A     | 0.9 $\pm$ 0.1 A     | 1.3 $\pm$ 0.2 a     | 1.4 $\pm$ 0.2 a     |
| Root K                                                    | 2.8 $\pm$ 0.8 A     | 2.5 $\pm$ 0.9 A     | 4.8 $\pm$ 0.6 a     | 5.0 $\pm$ 0.7 a     |
| Root Ca                                                   | 5.3 $\pm$ 0.7 A     | 7.0 $\pm$ 0.9 A     | 12 $\pm$ 2 a        | 14 $\pm$ 2 a        |
| Root Mg                                                   | 0.95 $\pm$ 0.07 A   | 1.12 $\pm$ 0.09 A   | 1.4 $\pm$ 0.2 a     | 1.4 $\pm$ 0.2 a     |
| Root Mn                                                   | 0.6 $\pm$ 0.1 A     | 0.7 $\pm$ 0.2 A     | 0.9 $\pm$ 0.1 a     | 1.1 $\pm$ 0.2 a     |
| Root Fe                                                   | 8.1 $\pm$ 0.9 B     | 12 $\pm$ 1 A        | 6.9 $\pm$ 0.7 a     | 6.1 $\pm$ 0.8 a     |
| Root Al                                                   | 5.3 $\pm$ 0.5 B     | 7.1 $\pm$ 0.7 A     | 4.6 $\pm$ 0.5 a     | 4.0 $\pm$ 0.6 a     |

**Table S4.** Average (least squares means  $\pm$  one standard error) growth metrics and tissue nutrient concentration by cultivar age class. Parameters not sharing the same uppercase (sufficient P) or lowercase (insufficient P) letter are significantly different (Tukey's HSD,  $p < 0.05$ ).

|                                                     | Sufficient P        |                     | Insufficient P      |                     |
|-----------------------------------------------------|---------------------|---------------------|---------------------|---------------------|
|                                                     | Old                 | Modern              | Old                 | Modern              |
| Plant Growth Metrics                                |                     |                     |                     |                     |
| Growth Stage                                        | 10.5 A              | 10.5 A              | 10.5 b              | 11 a                |
| Main Stem Height (cm)                               | 52 $\pm$ 3 A        | 55 $\pm$ 2 A        | 49 $\pm$ 3 a        | 46 $\pm$ 2 a        |
| Number of Tillers                                   | 2.6 $\pm$ 0.3 A     | 2.2 $\pm$ 0.2 A     | 2.1 $\pm$ 0.3 a     | 1.6 $\pm$ 0.3 a     |
| Number of Heads                                     | 1.3 $\pm$ 0.2 A     | 1.7 $\pm$ 0.1 A     | 0.81 $\pm$ 0.06 b   | 1.00 $\pm$ 0.05 a   |
| Shoot Mass (g)                                      | 1.1 $\pm$ 0.1 A     | 1.1 $\pm$ 0.1 A     | 0.46 $\pm$ 0.06 a   | 0.41 $\pm$ 0.05 a   |
| Root Mass (g)                                       | 0.36 $\pm$ 0.07 A   | 0.24 $\pm$ 0.05 A   | 0.11 $\pm$ 0.01 a   | 0.100 $\pm$ 0.009 a |
| Root:Shoot Ratio (g g <sup>-1</sup> )               | 0.35 $\pm$ 0.05 A   | 0.23 $\pm$ 0.04 A   | 0.24 $\pm$ 0.07 a   | 0.28 $\pm$ 0.06 a   |
| Tissue Nutrient Concentration (mg g <sup>-1</sup> ) |                     |                     |                     |                     |
| Shoot P                                             | 1.5 $\pm$ 0.2 A     | 1.4 $\pm$ 0.1 A     | 1.6 $\pm$ 0.1 a     | 1.86 $\pm$ 0.08 a   |
| Shoot K                                             | 27 $\pm$ 1 A        | 25 $\pm$ 1 A        | 26.0 $\pm$ 0.9 a    | 23.2 $\pm$ 0.7 b    |
| Shoot Ca                                            | 4.9 $\pm$ 0.3 A     | 4.7 $\pm$ 0.2 A     | 6.9 $\pm$ 0.5 a     | 6.8 $\pm$ 0.4 a     |
| Shoot Mg                                            | 1.31 $\pm$ 0.05 A   | 1.06 $\pm$ 0.04 B   | 1.46 $\pm$ 0.05 a   | 1.32 $\pm$ 0.04 b   |
| Shoot Mn                                            | 0.128 $\pm$ 0.008 A | 0.115 $\pm$ 0.006 A | 0.13 $\pm$ 0.01 a   | 0.118 $\pm$ 0.008 a |
| Shoot Fe                                            | 0.11 $\pm$ 0.01 A   | 0.103 $\pm$ 0.008 A | 0.17 $\pm$ 0.02 a   | 0.15 $\pm$ 0.01 a   |
| Shoot Al                                            | 0.047 $\pm$ 0.007 A | 0.041 $\pm$ 0.006 A | 0.053 $\pm$ 0.007 a | 0.047 $\pm$ 0.005 a |
| Root P                                              | 0.9 $\pm$ 0.1 A     | 0.8 $\pm$ 0.1 A     | 1.4 $\pm$ 0.2 a     | 1.4 $\pm$ 0.2 a     |
| Root K                                              | 2.6 $\pm$ 0.9 A     | 2.7 $\pm$ 0.8 A     | 5.2 $\pm$ 0.7 a     | 4.6 $\pm$ 0.6 a     |
| Root Ca                                             | 6.1 $\pm$ 0.8 A     | 6.2 $\pm$ 0.7 A     | 13 $\pm$ 2 a        | 13 $\pm$ 2 a        |
| Root Mg                                             | 1.04 $\pm$ 0.09 A   | 1.03 $\pm$ 0.07 A   | 1.3 $\pm$ 0.2 a     | 1.5 $\pm$ 0.2 a     |
| Root Mn                                             | 0.6 $\pm$ 0.2 A     | 0.6 $\pm$ 0.1 A     | 1.0 $\pm$ 0.2 a     | 1.0 $\pm$ 0.1 a     |
| Root Fe                                             | 12 $\pm$ 1 A        | 8 $\pm$ 1 B         | 6.5 $\pm$ 0.8 a     | 6.5 $\pm$ 0.7 a     |
| Root Al                                             | 6.9 $\pm$ 0.6 A     | 5.5 $\pm$ 0.5 A     | 4.2 $\pm$ 0.6 a     | 4.4 $\pm$ 0.5 a     |

**Table S5.** Average total nutrient removals per plant component (least squares means  $\pm$  one standard error) by cultivar dwarfing status. Parameters not sharing the same uppercase (sufficient P) or lowercase (insufficient P) letter are significantly different (Tukey's HSD,  $p < 0.05$ ).

| Total Nutrient<br>(mg) | Sufficient P        |                     | Insufficient P      |                     |
|------------------------|---------------------|---------------------|---------------------|---------------------|
|                        | Wild type           | Semi-dwarf          | Wild type           | Semi-dwarf          |
| Shoot P                | 1.7 $\pm$ 0.1 A     | 1.5 $\pm$ 0.2 A     | 0.64 $\pm$ 0.07 a   | 0.72 $\pm$ 0.09 a   |
| Shoot K                | 34 $\pm$ 3 A        | 24 $\pm$ 3 B        | 12 $\pm$ 1 a        | 10 $\pm$ 2 a        |
| Shoot Ca               | 6.1 $\pm$ 0.5 A     | 4.1 $\pm$ 0.6 B     | 3.4 $\pm$ 0.4 a     | 2.7 $\pm$ 0.4 a     |
| Shoot Mg               | 1.5 $\pm$ 0.1 A     | 1.1 $\pm$ 0.2 B     | 0.59 $\pm$ 0.06 a   | 0.55 $\pm$ 0.07 a   |
| Shoot Mn               | 0.15 $\pm$ 0.01 A   | 0.11 $\pm$ 0.01 B   | 0.053 $\pm$ 0.005 a | 0.046 $\pm$ 0.006 a |
| Shoot Fe               | 0.14 $\pm$ 0.01 A   | 0.10 $\pm$ 0.02 B   | 0.070 $\pm$ 0.005 a | 0.055 $\pm$ 0.007 a |
| Shoot Al               | 0.060 $\pm$ 0.008 A | 0.045 $\pm$ 0.008 B | 0.021 $\pm$ 0.002 a | 0.016 $\pm$ 0.002 a |
| Root P                 | 1.6 $\pm$ 0.4 A     | 0.8 $\pm$ 0.5 A     | 0.096 $\pm$ 0.008 a | 0.10 $\pm$ 0.01 a   |
| Root K                 | 0.59 $\pm$ 0.09 A   | 0.5 $\pm$ 0.1 A     | 0.35 $\pm$ 0.03 a   | 0.37 $\pm$ 0.04 a   |
| Root Ca                | 1.5 $\pm$ 0.2 A     | 1.2 $\pm$ 0.3 A     | 0.8 $\pm$ 0.1 a     | 1.0 $\pm$ 0.1 a     |
| Root Mg                | 1.1 $\pm$ 0.2 A     | 0.6 $\pm$ 0.3 A     | 0.103 $\pm$ 0.008 a | 0.10 $\pm$ 0.01 a   |
| Root Mn                | 2.7 $\pm$ 0.8 A     | 0.9 $\pm$ 1 A       | 0.071 $\pm$ 0.008 a | 0.079 $\pm$ 0.001 a |
| Root Fe                | 3.3 $\pm$ 0.7 A     | 2.5 $\pm$ 0.9 A     | 0.71 $\pm$ 0.09 a   | 0.6 $\pm$ 0.1 a     |
| Root Al                | 1.5 $\pm$ 0.3 A     | 1.5 $\pm$ 0.4 A     | 0.44 $\pm$ 0.05 a   | 0.36 $\pm$ 0.06 a   |

**Table S6.** Average total nutrient removals per plant component (least squares means  $\pm$  one standard error) by cultivar age classification. Parameters not sharing the same uppercase (sufficient P) or lowercase (insufficient P) letter are significantly different (Tukey's HSD,  $p < 0.05$ ).

| Total Nutrient<br>(mg) | Sufficient P        |                     | Insufficient P      |                     |
|------------------------|---------------------|---------------------|---------------------|---------------------|
|                        | Old                 | Modern              | Old                 | Modern              |
| Shoot P                | 1.6 $\pm$ 0.2 A     | 1.6 $\pm$ 0.1 A     | 0.67 $\pm$ 0.09 a   | 0.68 $\pm$ 0.07 a   |
| Shoot K                | 29 $\pm$ 3 A        | 28 $\pm$ 3 A        | 12 $\pm$ 2 a        | 9 $\pm$ 1 a         |
| Shoot Ca               | 5.1 $\pm$ 0.6 A     | 5.1 $\pm$ 0.5 A     | 3.3 $\pm$ 0.4 a     | 2.8 $\pm$ 0.4 a     |
| Shoot Mg               | 1.4 $\pm$ 0.2 A     | 1.2 $\pm$ 0.1 A     | 0.63 $\pm$ 0.07 a   | 0.51 $\pm$ 0.06 a   |
| Shoot Mn               | 0.13 $\pm$ 0.02 A   | 0.12 $\pm$ 0.01 A   | 0.055 $\pm$ 0.006 a | 0.044 $\pm$ 0.005 a |
| Shoot Fe               | 0.13 $\pm$ 0.02 A   | 0.13 $\pm$ 0.01 A   | 0.072 $\pm$ 0.007 a | 0.053 $\pm$ 0.005 b |
| Shoot Al               | 0.055 $\pm$ 0.008 A | 0.050 $\pm$ 0.008 A | 0.020 $\pm$ 0.002 a | 0.017 $\pm$ 0.001 a |
| Root P                 | 1.4 $\pm$ 0.5 A     | 1.0 $\pm$ 0.4 A     | 0.11 $\pm$ 0.01 a   | 0.093 $\pm$ 0.008 a |
| Root K                 | 0.6 $\pm$ 0.1 A     | 0.41 $\pm$ 0.09 A   | 0.41 $\pm$ 0.04 a   | 0.31 $\pm$ 0.03 b   |
| Root Ca                | 1.6 $\pm$ 0.3 A     | 1.2 $\pm$ 0.2 A     | 1.0 $\pm$ 0.1 a     | 0.9 $\pm$ 0.1 a     |
| Root Mg                | 0.9 $\pm$ 0.3 A     | 0.7 $\pm$ 0.2 A     | 0.10 $\pm$ 0.01 a   | 0.101 $\pm$ 0.008 a |
| Root Mn                | 2 $\pm$ 1 A         | 1.7 $\pm$ 0.8 A     | 0.08 $\pm$ 0.01 a   | 0.074 $\pm$ 0.008 a |
| Root Fe                | 3.4 $\pm$ 0.9 A     | 2.4 $\pm$ 0.7 A     | 0.7 $\pm$ 0.1 a     | 0.6 $\pm$ 0.09 a    |
| Root Al                | 1.9 $\pm$ 0.4 A     | 1.1 $\pm$ 0.3 A     | 0.42 $\pm$ 0.06 a   | 0.37 $\pm$ 0.05 a   |

**Table S7.** Average (least squares means  $\pm$  one standard error) soil physicochemical data and microbial group concentration by cultivar dwarfing status. Parameters not sharing the same uppercase (sufficient P) or lowercase (insufficient P) letter are significantly different (Tukey's HSD,  $p < 0.05$ ).

|                                                           | Sufficient P        |                     | Insufficient P      |                     |
|-----------------------------------------------------------|---------------------|---------------------|---------------------|---------------------|
|                                                           | Wild type           | Semi-dwarf          | Wild type           | Semi-dwarf          |
| Bulk Soil Physicochemical Variables                       |                     |                     |                     |                     |
| pH                                                        | 4.77 $\pm$ 0.08 A   | 4.79 $\pm$ 0.1 A    | 4.87 $\pm$ 0.08 a   | 4.8 $\pm$ 0.1 a     |
| P (mg kg <sup>-1</sup> )                                  | 5.7 $\pm$ 0.4 A     | 4.2 $\pm$ 0.5 B     | 6.1 $\pm$ 0.2 a     | 5.8 $\pm$ 0.2 a     |
| K (mg kg <sup>-1</sup> )                                  | 55 $\pm$ 2 B        | 66 $\pm$ 3 A        | 87 $\pm$ 2 a        | 85 $\pm$ 3 a        |
| Ca (mg kg <sup>-1</sup> )                                 | 1432 $\pm$ 48 A     | 1498 $\pm$ 64 A     | 1525 $\pm$ 47 a     | 1487 $\pm$ 61 a     |
| Mg (mg kg <sup>-1</sup> )                                 | 117 $\pm$ 2 A       | 118 $\pm$ 3 A       | 119 $\pm$ 1 a       | 114 $\pm$ 2 b       |
| Mn (mg kg <sup>-1</sup> )                                 | 150 $\pm$ 8 A       | 142 $\pm$ 9 A       | 141 $\pm$ 7 a       | 143 $\pm$ 8 a       |
| Fe (mg kg <sup>-1</sup> )                                 | 84 $\pm$ 5 A        | 77 $\pm$ 6 A        | 103 $\pm$ 6 a       | 97 $\pm$ 7 a        |
| Al (mg kg <sup>-1</sup> )                                 | 716 $\pm$ 9 A       | 723 $\pm$ 11 A      | 762 $\pm$ 9 a       | 743 $\pm$ 11 a      |
| Cu (mg kg <sup>-1</sup> )                                 | 2.9 $\pm$ 0.1 A     | 3.0 $\pm$ 0.1 A     | 2.9 $\pm$ 0.2 b     | 3.5 $\pm$ 0.2 a     |
| Zn (mg kg <sup>-1</sup> )                                 | 1.41 $\pm$ 0.04 A   | 1.52 $\pm$ 0.05 A   | 1.29 $\pm$ 0.4 a    | 1.35 $\pm$ 0.5 a    |
| Total N (%)                                               | 0.165 $\pm$ 0.002 A | 0.169 $\pm$ 0.003 A | 0.166 $\pm$ 0.001 a | 0.163 $\pm$ 0.002 a |
| Total C (%)                                               | 1.72 $\pm$ 0.03 A   | 1.73 $\pm$ 0.03 A   | 1.76 $\pm$ 0.02 a   | 1.74 $\pm$ 0.03 a   |
| Rhizosphere Hedley P Fractions (mg kg <sup>-1</sup> )     |                     |                     |                     |                     |
| Resin P                                                   | 5.2 $\pm$ 0.4 A     | 5.5 $\pm$ 0.6 A     | 3.7 $\pm$ 0.3 a     | 3.3 $\pm$ 0.3 a     |
| Bicarbonate P                                             | 12.8 $\pm$ 0.6 A    | 12.2 $\pm$ 0.7 A    | 11.2 $\pm$ 0.4 b    | 12.9 $\pm$ 0.5 a    |
| Microbial Biomarker Concentration (nmol g <sup>-1</sup> ) |                     |                     |                     |                     |
| Total Biomass                                             | 42 $\pm$ 1 A        | 40 $\pm$ 1 A        | 40.5 $\pm$ 0.8 a    | 40 $\pm$ 1 a        |
| G+ Bacteria                                               | 12.8 $\pm$ 0.4 A    | 11.3 $\pm$ 0.5 B    | 12.3 $\pm$ 0.3 a    | 11.2 $\pm$ 0.4 b    |
| G- Bacteria                                               | 18.9 $\pm$ 0.5 A    | 18.8 $\pm$ 0.6 A    | 18.4 $\pm$ 0.4 a    | 18.6 $\pm$ 0.5 a    |
| General Fungi                                             | 1.28 $\pm$ 0.06 A   | 1.25 $\pm$ 0.08 A   | 1.10 $\pm$ 0.06 a   | 1.18 $\pm$ 0.08 a   |
| AMF                                                       | 1.38 $\pm$ 0.05 A   | 1.30 $\pm$ 0.05 A   | 1.27 $\pm$ 0.06 a   | 1.32 $\pm$ 0.07 a   |
| Actinobacteria                                            | 6.9 $\pm$ 0.2 A     | 6.6 $\pm$ 0.3 A     | 6.8 $\pm$ 0.2 a     | 6.7 $\pm$ 0.2 a     |
| Protists                                                  | 0.58 $\pm$ 0.02 B   | 0.67 $\pm$ 0.03 A   | 0.56 $\pm$ 0.02 b   | 0.63 $\pm$ 0.02 a   |

**Table S8.** Average (least squares means  $\pm$  one standard error) soil physicochemical data and microbial group concentration by cultivar age classification. Table 3. Parameters not sharing the same uppercase (sufficient P) or lowercase (insufficient P) letter are significantly different (Tukey's HSD,  $p < 0.05$ ).

|                                                           | Sufficient P        |                     | Insufficient P      |                     |
|-----------------------------------------------------------|---------------------|---------------------|---------------------|---------------------|
|                                                           | Old                 | Modern              | Old                 | Modern              |
| Bulk Soil Physicochemical                                 |                     |                     |                     |                     |
| pH                                                        | 4.79 $\pm$ 0.1 A    | 4.77 $\pm$ 0.08 A   | 4.86 $\pm$ 0.1 a    | 4.85 $\pm$ 0.08 a   |
| P (mg kg <sup>-1</sup> )                                  | 5.0 $\pm$ 0.5 A     | 4.9 $\pm$ 0.4 A     | 5.8 $\pm$ 0.2 a     | 6.1 $\pm$ 0.2 a     |
| K (mg kg <sup>-1</sup> )                                  | 59 $\pm$ 3 A        | 63 $\pm$ 2 A        | 84 $\pm$ 3 a        | 87 $\pm$ 2 a        |
| Ca (mg kg <sup>-1</sup> )                                 | 1475 $\pm$ 63 A     | 1455 $\pm$ 49 A     | 1512 $\pm$ 61 a     | 1500 $\pm$ 48 a     |
| Mg (mg kg <sup>-1</sup> )                                 | 119 $\pm$ 3 A       | 116 $\pm$ 2 A       | 117 $\pm$ 2 a       | 116 $\pm$ 1 a       |
| Mn (mg kg <sup>-1</sup> )                                 | 159 $\pm$ 9 A       | 134 $\pm$ 8 B       | 148 $\pm$ 8 a       | 136 $\pm$ 7 a       |
| Fe (mg kg <sup>-1</sup> )                                 | 75 $\pm$ 6 A        | 87 $\pm$ 5 A        | 95 $\pm$ 7 a        | 104 $\pm$ 6 a       |
| Al (mg kg <sup>-1</sup> )                                 | 714 $\pm$ 11 A      | 725 $\pm$ 9 A       | 741 $\pm$ 12 a      | 764 $\pm$ 9 a       |
| Cu (mg kg <sup>-1</sup> )                                 | 3.1 $\pm$ 0.1 A     | 2.8 $\pm$ 0.1 A     | 3.2 $\pm$ 0.2 a     | 3.2 $\pm$ 0.2 a     |
| Zn (mg kg <sup>-1</sup> )                                 | 1.46 $\pm$ 0.05 A   | 1.48 $\pm$ 0.04 A   | 1.34 $\pm$ 0.05 a   | 1.30 $\pm$ 0.04 a   |
| Total N (%)                                               | 0.167 $\pm$ 0.003 A | 0.167 $\pm$ 0.002 A | 0.166 $\pm$ 0.002 a | 0.164 $\pm$ 0.001 a |
| Total C (%)                                               | 1.74 $\pm$ 0.03 A   | 1.71 $\pm$ 0.03 A   | 1.77 $\pm$ 0.03 a   | 1.72 $\pm$ 0.02 a   |
| Rhizosphere Hedley P Fractions (mg kg <sup>-1</sup> )     |                     |                     |                     |                     |
| Resin P                                                   | 5.3 $\pm$ 0.5 A     | 5.4 $\pm$ 0.4 A     | 3.0 $\pm$ 0.3 b     | 4.0 $\pm$ 0.3 a     |
| Bicarbonate P                                             | 12.3 $\pm$ 0.7 A    | 12.7 $\pm$ 0.6 A    | 12.1 $\pm$ 0.5 a    | 11.9 $\pm$ 0.4 a    |
| Microbial Biomarker Concentration (nmol g <sup>-1</sup> ) |                     |                     |                     |                     |
| Total Biomass                                             | 42 $\pm$ 1 A        | 40 $\pm$ 1 A        | 41 $\pm$ 1 a        | 39.4 $\pm$ 0.8 a    |
| G+ Bacteria                                               | 12.0 $\pm$ 0.5 A    | 12.1 $\pm$ 0.5 A    | 11.8 $\pm$ 0.4 a    | 11.7 $\pm$ 0.3 a    |
| G- Bacteria                                               | 19.6 $\pm$ 0.6 A    | 18.1 $\pm$ 0.5 B    | 19.0 $\pm$ 0.5 a    | 18.0 $\pm$ 0.4 a    |
| General Fungi                                             | 1.26 $\pm$ 0.08 A   | 1.28 $\pm$ 0.06 A   | 1.09 $\pm$ 0.08 a   | 1.19 $\pm$ 0.06 a   |
| AMF                                                       | 1.38 $\pm$ 0.05 A   | 1.30 $\pm$ 0.04 A   | 1.32 $\pm$ 0.07 a   | 1.28 $\pm$ 0.07 a   |
| Actinobacteria                                            | 7.0 $\pm$ 0.3 A     | 6.5 $\pm$ 0.2 A     | 7.0 $\pm$ 0.2 a     | 6.6 $\pm$ 0.1 a     |
| Protists                                                  | 0.65 $\pm$ 0.03 A   | 0.60 $\pm$ 0.02 A   | 0.60 $\pm$ 0.2 a    | 0.59 $\pm$ 0.02 a   |

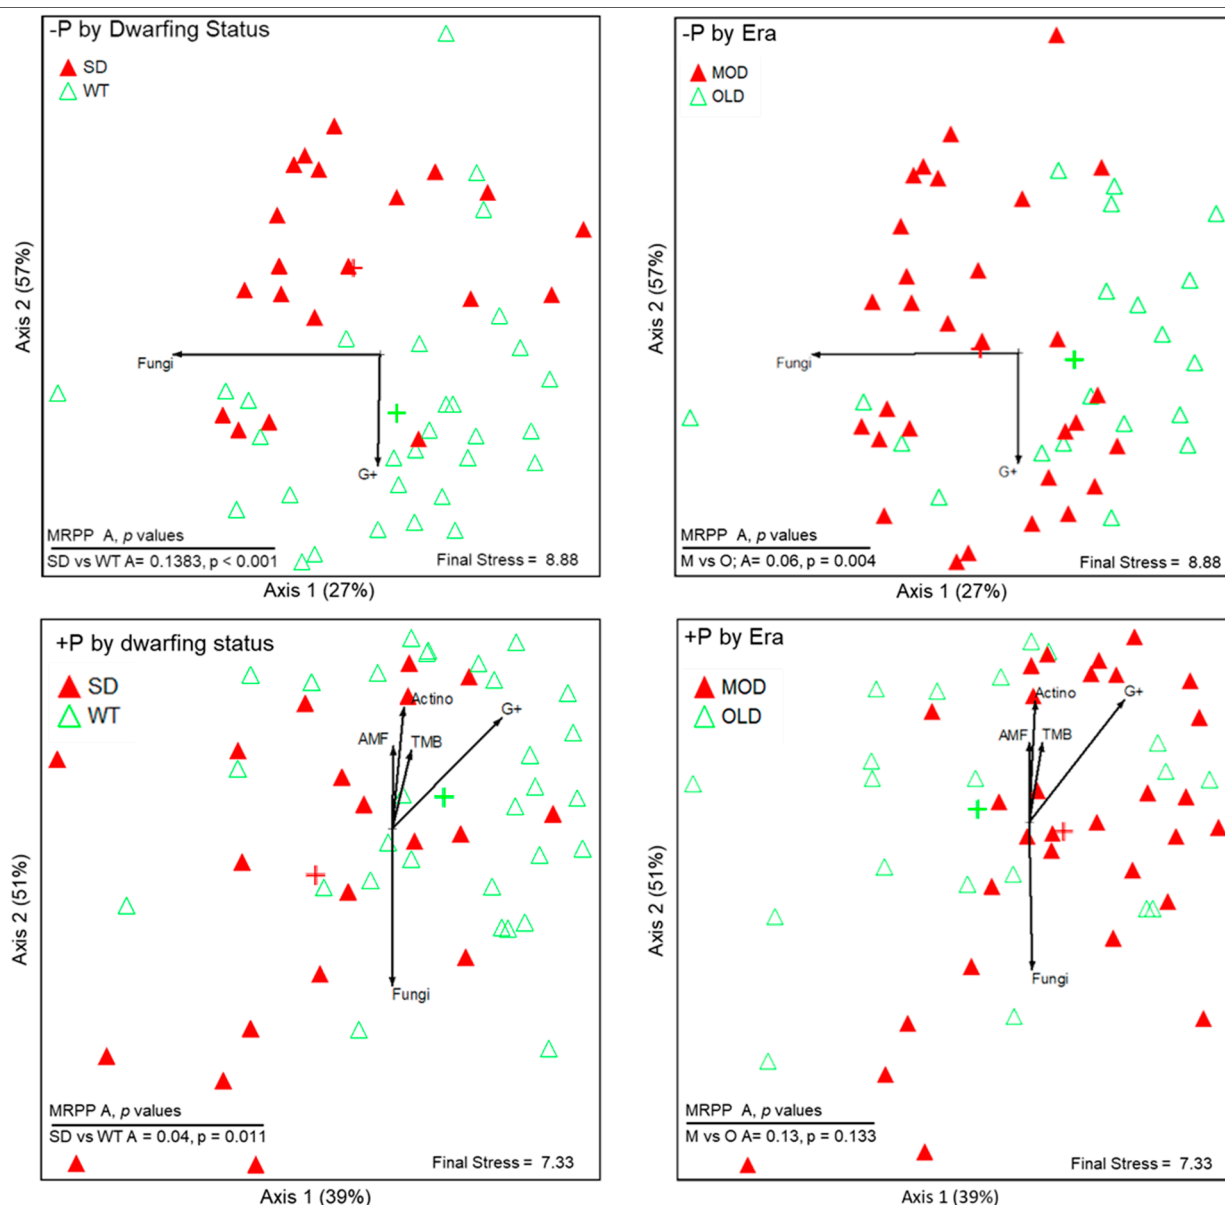

**Figure S1.** Nonmetric multidimensional scaling (NMDS) ordination biplots of Hellinger transformed microbial biomarker group FAMES showing the separation in microbial communities based on dwarfing status (semi-dwarf vs. wild type) and era (modern vs. old) in insufficient (-P) or sufficient (+P) conditions. The NMDS resulted in a 3D solution with only the two dominant axes being shown which cumulatively explain 90% (+P) and 84% (-P) of the overall variance in the dataset. Results from multiple regression permutation procedure (MRPP) to test for the differences between groups are shown in each panel. PLFA biomarker group concentrations with  $r^2 > 0.30$  between the variable and axis score are displayed as vectors. Vectors indicate strength (length of arrow) and direction of graphed relationships.
